# Supplementary material for: Influence of Individual Radiosensitivity on the Adaptive Response Phenomenon: Toward a Mechanistic Explanation Based on the Nucleo-Shuttling of ATM Protein
Source: PubMed Central journal article supplement — Dose Response. 2018 Aug 6;16(3):1559325818789836. doi: 10.1177/1559325818789836 (PMC6081762; doi:10.1177/1559325818789836), 2018-08-06
Supplement: Supplemental_Data.pdf [file Supplemental_Data.pdf]

## Supplementary Data

**Figure S1 : Google Ngram Viewer wording analysis of the occurrence of the terms « hormesis » and « adaptive response » through history.** This graph was obtained by using the Google books Ngram Viewer tool available at <https://books.google.com/ngrams>

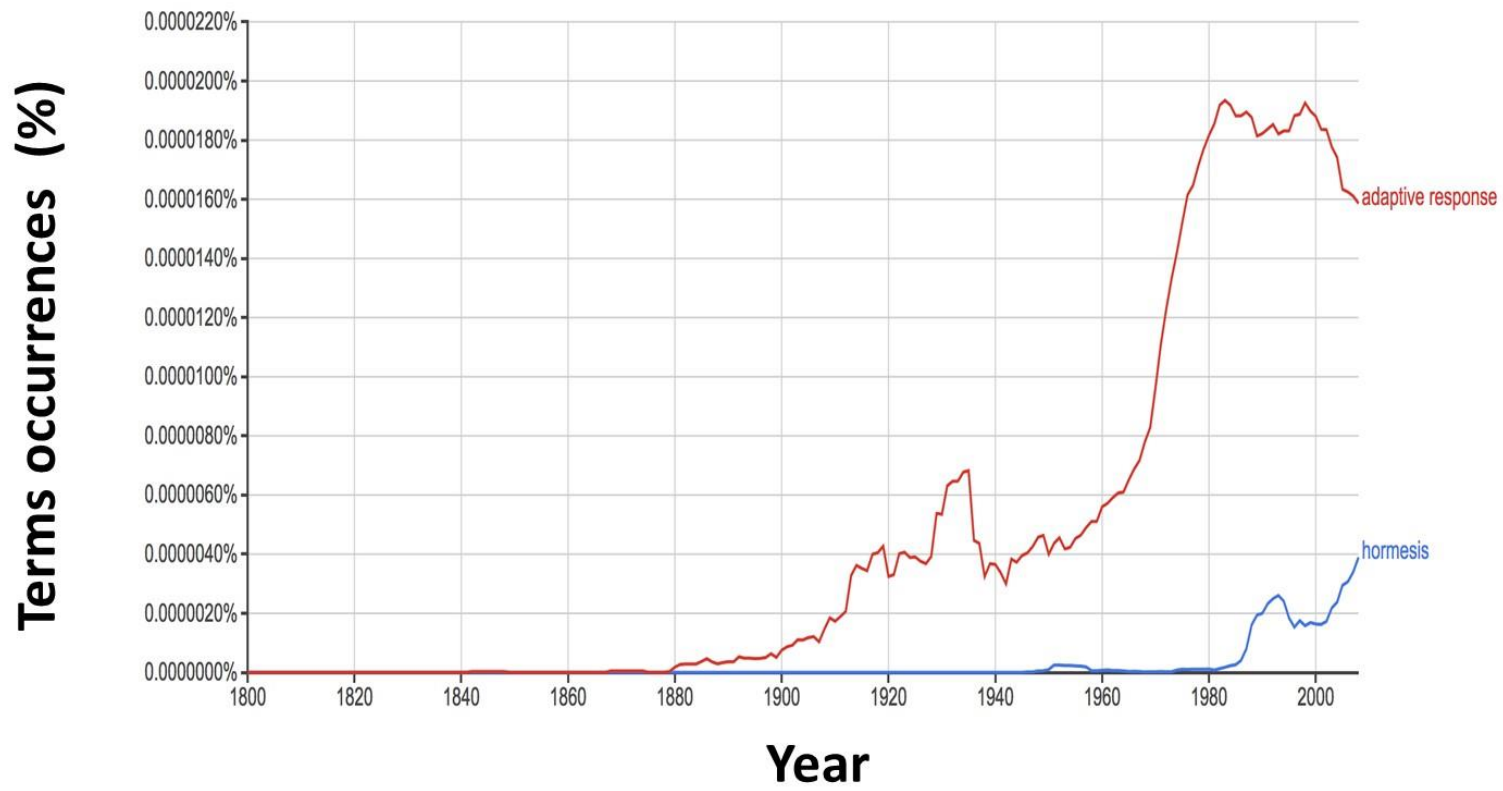

Figure S1
